# Supplementary material
Source: PubMed Central journal article supplement (PMC2789788)
Supplement: supp_M900002-JLR200_Primers.pdf [file supp_M900002-JLR200_Primers.pdf]

## Online-Only Appendix

**Table 1.** Oligonucleotide primers for quantitative real-time PCR.

| Gene           | Genbank accession number | Primers (forward/reverse)                           |
|----------------|--------------------------|-----------------------------------------------------|
| SPT1           | Y08685                   | GGATTTGCCACCATAGCC / GAGTTACACGAGCCTTGC             |
| SPT2           | Y08686                   | AGGATGTGGATGTTATGATGG / AATGTGTTTCGCAGGTAGTC        |
| al/n-CDase     | AF449759                 | ACATTACCACTTATGAAGAATACC / CCGTAGCAATAGCCTTAGC      |
| a-CDase        | NM_004315                | AGCGTGGGTGTTGAATCC / ACAGCAGTTAGAACCAGAAGG          |
| SPHK1          | AF238083                 | AAGACCTCCTGACCAACTG / ACGCCGATACTTCTCACTC           |
| SPHK2          | AF245447                 | CATCCAGACAGAACGACAG / CACAGGCATCTTCACAGC            |
| n-SMase        | NM_017751                | GTGGAGTACAGCATCGTGATG / ACCAGGCAAGTAGGAGACAG        |
| a-SMase        | NM_000543                | GCCTTAATCCTGGTTACCGTGTG / ATGTTTGCCTGGGTCAGATTCAG   |
| CPT1-M/L       | NM_004377                | GTGTATCCGCCTTCTATCCAG / CGGTAATATTCCTCATCATCCAAC    |
| FAT/CD36       | NM_001001548             | GGACGCTGAGGACAACAC / GCCAGATTGAGAAGTGTGAAG          |
| LPL            | NM_000237                | CAGACTCATCTACACAGCAGTATG / CCCTTTCTTCGTCCTCTCC      |
| PDK4           | NM_002612                | GAAGGTTGGCAGACCAGTTG / TGCTTCCCTCTCTTCCTATATCC      |
| ACO1           | NM_004035                | TGGGTCATTGGTTGTCTTGGGAAG / AGTGTAGTCCGCAGTCTGAATGTG |
| $\beta$ -actin | NM_001101                | TCGTGCGTGACATTAAGGAG / GAAGGAAGGCTGGAAGAGTG         |

Primers were designed using Beacon Designer Software (Premier Biosoft). SPT – serine palmitoyltransferase, al/n-CDase – neutral/alkaline ceramidase, a-CDase – acid ceramidase, SPHK – sphingosine kinase, n-SMase – neutral sphingomyelinase, a-SMase – acid sphingomyelinase, CPT1-M/L – carnitine palmitoyltransferase 1 muscle/liver isoform, FAT/CD36 – fatty acid translocase/CD36, LPL – lipoprotein lipase, PDK4 – pyruvate dehydrogenase kinase 4, ACO1 – acyl-CoA oxidase 1.
